# Supplementary material for: Digital PCR Validation for Characterization of Quantitative Reference Material of Escherichia coli O157:H7 Genomic DNA
Source: Preprints.org preprint supplement (doi:10.20944/preprints202406.1226.v1), 2024-06-18
Supplement: Supplementary file 1 [file supplementary]

Supplementary information for article “Digital PCR validation for characterization of quantitative reference material of Escherichia coli O157:H7 genomic DNA”

# Method validation

***Table S1.*** *Primers and probes of target genes used for E. coli ddPCR study.*

| **Microorganism** | **Gene** | **Sequences** | **Reference** |
| --- | --- | --- | --- |
| ***Escherichia coli***  ***Shigella spp.*** | *uidA* | GCAAGGTGCACGGGAATATT | [1] |
| CAGGTGATCGGACGCGT |
| [HEX] CGC CAC TGG CGG AAG CAA CG [BHQ1] |
| ***Escherichia coli*** | *lacY* | TGCTGGCTGGCACTATTATG | Adapted from ([2], [3]) |
| GCACTTCAAACTGGCTGGTA |
| [FAM] CCG TTC CTG CTG GTG GGC TGC TT [BHQ1] |
| ***Diarrheogenic Escherichia coli*** | *eaeA* | CATTGATCAGGATTTTTCTGGTGATA | [4] |
| CTCATGCGGAAATAGCCGTTA |
| [FAM] ATA GTC TCG CCA GTA TTC GCC ACC AAT ACC [BHQ1] |
| ***Enteropathogenic Escherichia coli* O157**  **(EPEC)** | *rfbE* | TTTCACACTTATTGGATGGTCTCAA | [5] |
| CGATGAGTTTATCTGCAAGGTGAT |
| [HEX] AGG ACC GCA GAG GAA AGA GAG GAA TTA AGG [BHQ1] |
| ***Escherichia coli producing Shiga toxins (*STEC*)*** | *stx1* | TTTGTTACTGTGACAGCTGAAGCTTTACG | [5] |
| CCCCAGTTCAATGTAAGATCAACATC |
| [FAM] CTG GAT GAT CTC AGT GGG CGT TCT TAT GTA A [BHQ1] |
| *stx2* | TTTGTCACTGTCACAGCAGAAGCCTTACG |
| CCCCAGTTCAGAGTGAGGTCCACGTC |
| [HEX] TCG TCA GGC ACT GTC TGA AAC TGC TCC [BHQ1] |
| ***Escherichia coli* O157:H7** | *Z3276* | CGGGGGATACATTTACGCTT | [6], [7] |
| TTTCTGAGCTGGAACAAGGC |
| [FAM] ACGGTGTTTTCAGGCTTACAGGTCGT [BHQ1] |

**Figure S1**. *2% agarose electrophoresis of amplification products of E. coli O157:H7 gene targets.*


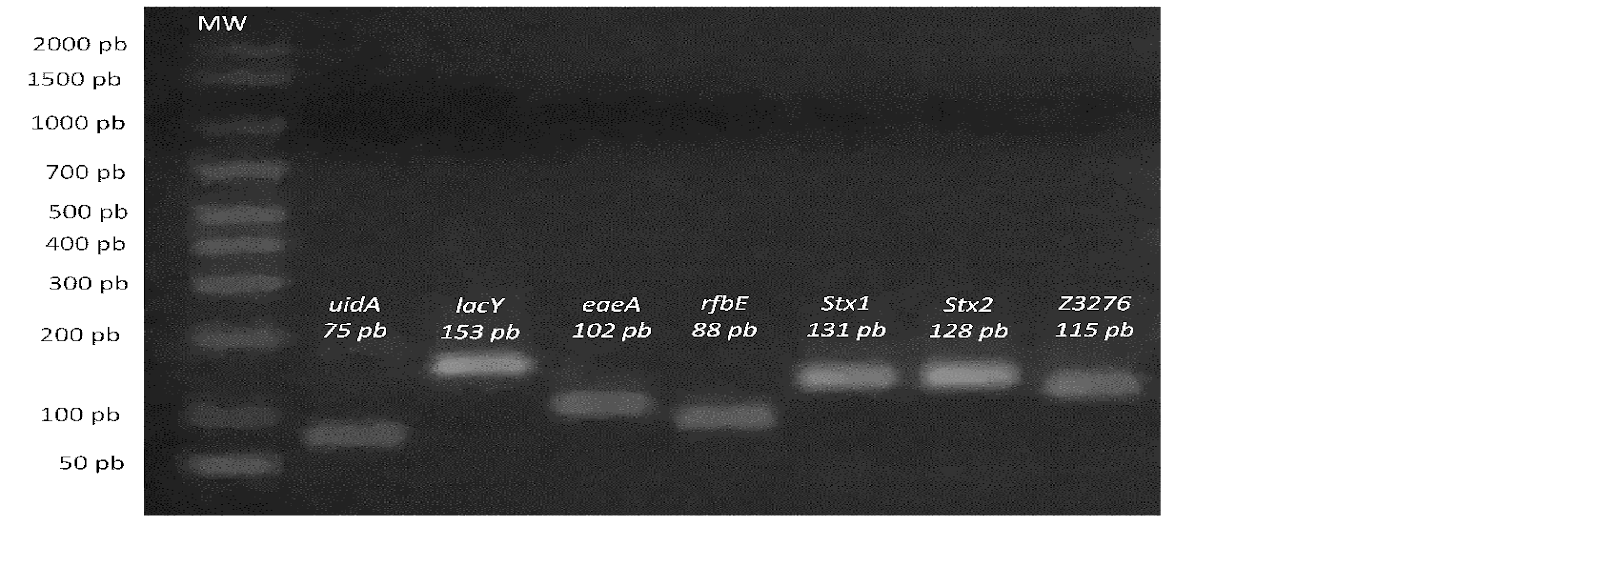


**Figure S2**. *Linear interval for DNA targets in E. coli O157:H7 gene quantification by ddPCR*


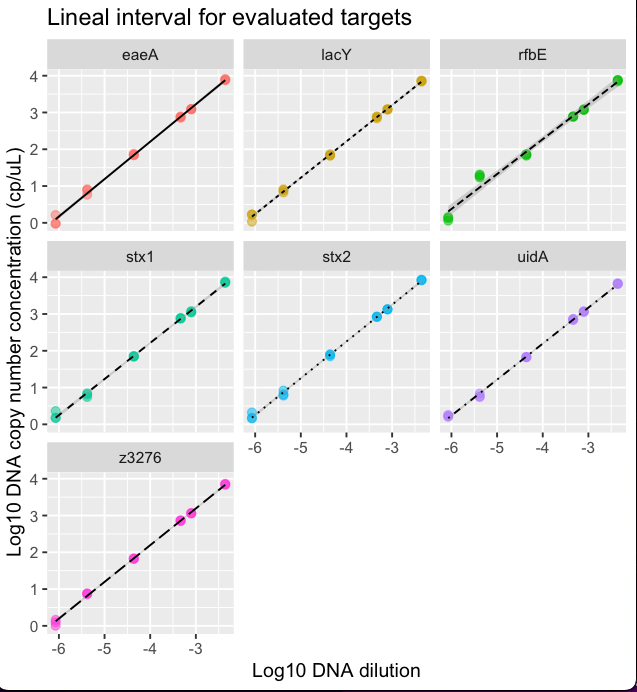


Amplification curves and linearity graphs of the amplification cycle depending on the logarithm of the MRC IRMM 449 DNA dilution by qPCR.

**Tables S2-S8.** Data of precision experiments performed in three different days at five sample concentration levels with three replicas for each sequence target.

**Table S2**. uidA measurement results in ddPCR reaction

| **Level** | **Day** | **Replicate 1** | **Replicate 2** | **Replicate 3** | **Dilution** |
| --- | --- | --- | --- | --- | --- |
| 1 | 1 | 6540,13 | 6697,62 | 6794,56 | 8,66E-02 |
| 2 | 6794,82 | 7533,69 | 7062,06 | 9,28E-02 |
| 3 | 6530,17 | 6545,06 | 6896,68 | 8,92E-02 |
| 2 | 1 | 683,96 | 712,77 | 740,21 | 9.12E-02 |
| 2 | 639,56 | 660,39 | 614,79 | 7,83E-02 |
| 3 | 681,27 | 652,63 | 672,99 | 8,24E-02 |
| 3 | 1 | 67,10 | 68,38 | 66,68 | 8,75E-02 |
| 2 | 59,70 | 68,85 | 56,71 | 8,08E-02 |
| 3 | 61,40 | 62,90 | 59,34 | 8,10E-02 |
| 4 | 1 | 5,75 | 5,53 | 6,85 | 8,47E-02 |
| 2 | 6,85 | 7,16 | 6,16 | 8,03E-02 |
| 3 | 5,06 | 6,12 | 5,13 | 8,04E-02 |
| 5 | 1 | 1,69 | 1,60 | 1,80 | 8,55E-02 |
| 2 | 1,68 | 1,33 | 1,33 | 8,35E-02 |
| 3 | 1,05 | 2,02 | 1,48 | 8,03E-02 |

**Table S3.** lacY measurement results in ddPCR reaction.

| **Level** | **Day** | **Replicate 1** | **Replicate 2** | **Replicate 3** | **Dilution** |
| --- | --- | --- | --- | --- | --- |
| 1 | 1 | 6898,69 | 7222,34 | 7401,78 | 8,54E-02 |
| 2 | 7678,82 | 8255,54 | 7688,78 | 9,30E-02 |
| 3 | 8031,36 | 7980,63 | 8355,61 | 9,10E-02 |
| 2 | 1 | 696,06 | 779,84 | 759,19 | 9.12E-02 |
| 2 | 691,99 | 672,64 | 662,83 | 7,83E-02 |
| 3 | 725,92 | 685,97 | 687,31 | 8,24E-02 |
| 3 | 1 | 67,25 | 67,67 | 73,66 | 8,75E-02 |
| 2 | 63,28 | 66,85 | 65,71 | 8,08E-02 |
| 3 | 61,33 | 60,74 | 63,80 | 8,10E-02 |
| 4 | 1 | 6,73 | 8,12 | 7,71 | 8,47E-02 |
| 2 | 7,28 | 5,77 | 6,43 | 8,03E-02 |
| 3 | 5,99 | 5,29 | 5,67 | 8,04E-02 |
| 5 | 1 | 1,69 | 1,67 | 1,08 | 8,55E-02 |
| 2 | 1,17 | 0,99 | 1,72 | 8,35E-02 |
| 3 | 1,48 | 1,59 | 1,48 | 8,03E-02 |

**Table S4**. eaeA measurement results in ddPCR reaction

| **Level** | **Day** | **Replicate 1** | **Replicate 2** | **Replicate 3** | **Dilution** |
| --- | --- | --- | --- | --- | --- |
| 1 | 1 | 7536,62 | 7786,61 | 8102,18 | 8,87E-02 |
| 2 | 8969,36 | 8174,37 | 8417,44 | 9,47E-02 |
| 3 | 9724,67 | 9159,13 | 10300,70 | 8,57E-02 |
| 2 | 1 | 753,44 | 780,90 | 720,52 | 8,97E-02 |
| 2 | 719,06 | 714,51 | 595,67 | 8,04E-02 |
| 3 | 741,42 | 739,41 | 749,84 | 8,08E-02 |
| 3 | 1 | 68,36 | 75,74 | 70,42 | 8,54E-02 |
| 2 | 67,24 | 57,72 | 66,29 | 7,85E-02 |
| 3 | 71,56 | 71,60 | 55,37 | 7,72E-02 |
| 4 | 1 | 7,73 | 5,81 | 8,16 | 8,45E-02 |
| 2 | 6,60 | 6,54 | 6,79 | 7,96E-02 |
| 3 | 6,96 | 6,27 | 6,75 | 7,85E-02 |
| 5 | 1 | 0,96 | 0,95 | 1,63 | 8,52E-02 |
| 2 | 1,06 | 1,25 | 0,82 | 8,40E-02 |
| 3 | 1,07 | 1,59 | 1,20 | 7,93E-02 |

**Table S5**. rfbE measurement results in ddPCR reaction

| **Level** | **Day** | **Replicate 1** | **Replicate 2** | **Replicate 3** | **Dilution** |
| --- | --- | --- | --- | --- | --- |
| 1 | 1 | 7025,54 | 7612,30 | 7633,26 | 8,64E-02 |
| 2 | 7859,07 | 8008,88 | 7753,30 | 9,16E-02 |
| 3 | 8026,80 | 8103,37 | 7509,71 | 9,11E-02 |
| 2 | 1 | 769,02 | 766,27 | 787,97 | 9,02E-02 |
| 2 | 715,78 | 705,07 | 716,13 | 7,87E-02 |
| 3 | 694,99 | 692,05 | 699,02 | 7,92E-02 |
| 3 | 1 | 67,04 | 71,84 | 73,73 | 8,60E-02 |
| 2 | 63,97 | 64,42 | 68,45 | 7,71E-02 |
| 3 | 66,54 | 63,37 | 65,73 | 8,14E-02 |
| 4 | 1 | 20,54 | 17,23 | 18,89 | 8,48E-02 |
| 2 | 18,76 | 17,07 | 18,36 | 7,92E-02 |
| 3 | 18,82 | 18,20 | 17,02 | 7,90E-02 |
| 5 | 1 | 1,33 | 1,44 | 1,15 | 8,43E-02 |
| 2 | 1,41 | 1,55 | 1,24 | 8,47E-02 |
| 3 | 0,96 | 1,40 | 0,85 | 8,08E-02 |

**Table S6**. stx1 measurement results in ddPCR reaction

| **Level** | **Day** | **Replicate 1** | **Replicate 2** | **Replicate 3** | **Dilution** |
| --- | --- | --- | --- | --- | --- |
| 1 | 1 | 7005,08 | 7281,22 | 7673,33 | 8,56E-02 |
| 2 | 7648,85 | 7814,37 | 7899,21 | 9,24E-02 |
| 3 | 7569,11 | 6978,06 | 7019,57 | 8,77E-02 |
| 2 | 1 | 758,91 | 749,29 | 781,04 | 9,02E-02 |
| 2 | 695,38 | 698,07 | 686,75 | 7,87E-02 |
| 3 | 699,22 | 683,37 | 700,67 | 7,92E-02 |
| 3 | 1 | 70,58 | 72,01 | 69,02 | 8,60E-02 |
| 2 | 63,97 | 64,42 | 68,45 | 7,71E-02 |
| 3 | 67,98 | 67,26 | 63,87 | 8,14E-02 |
| 4 | 1 | 6,98 | 5,53 | 6,46 | 8,48E-02 |
| 2 | 7,11 | 6,39 | 6,07 | 7,92E-02 |
| 3 | 6,56 | 5,13 | 5,43 | 7,90E-02 |
| 5 | 1 | 1,48 | 1,52 | 2,30 | 8,43E-02 |
| 2 | 0,74 | 1,23 | 1,77 | 8,47E-02 |
| 3 | 1,84 | 1,48 | 1,08 | 8,08E-02 |

**Table S7**. stx2 measurement results in ddPCR reaction

| **Level** | **Day** | **Replicate 1** | **Replicate 2** | **Replicate 3** | **Dilution** |
| --- | --- | --- | --- | --- | --- |
| 1 | 1 | 8553,49 | 8414,37 | 8198,42 | 8,71E-02 |
| 2 | 11086,21 | 9778,56 |  | 9,14E-02 |
| 3 | 11193,89 | 11182,05 |  | 8,76E-02 |
| 2 | 1 | 832,77 | 853,86 | 835,48 | 8,79E-02 |
| 2 | 775,25 | 771,97 | 749,30 | 7,91E-02 |
| 3 | 805,62 | 775,25 | 736,90 | 8,05E-02 |
| 3 | 1 | 71,06 | 80,93 | 77,32 | 8,43E-02 |
| 2 | 72,67 | 68,24 | 71,31 | 7,93E-02 |
| 3 | 80,04 | 67,43 | 49,44 | 7,81E-02 |
| 4 | 1 | 6,50 | 6,06 | 8,28 | 8,49E-02 |
| 2 | 6,25 | 7,15 | 6,72 | 7,68E-02 |
| 3 | 6,73 | 8,26 | 6,59 | 7,76E-02 |
| 5 | 1 | 2,10 | 1,50 | 1,45 | 8,52E-02 |
| 2 | 0,93 | 1,45 | 1,08 | 8,54E-02 |
| 3 | 1,60 | 0,91 | 1,03 | 7,86E-02 |

**Table S8**. Z3276 measurement results in ddPCR reaction

| **Level** | **Day** | **Replicate 1** | **Replicate 2** | **Replicate 3** | **Dilution** |
| --- | --- | --- | --- | --- | --- |
| 1 | 1 | 6873,09 | 7322,71 | 7001,59 | 8,62E-02 |
| 2 | 7188,09 | 7373,52 | 7241,81 | 8,66E-02 |
| 3 | 7419,37 | 7572,51 | 7556,88 | 9,28E-02 |
| 2 | 1 | 702,38 | 732,91 | 740,48 | 8,87E-02 |
| 2 | 689,01 | 653,75 | 615,59 | 8,04E-02 |
| 3 | 686,06 | 671,08 | 693,41 | 7,96E-02 |
| 3 | 1 | 67,64 | 66,15 | 67,71 | 8,64E-02 |
| 2 | 64,09 | 63,35 | 58,65 | 7,85E-02 |
| 3 | 60,03 | 61,54 | 63,66 | 7,84E-02 |
| 4 | 1 | 7,56 | 7,63 | 7,18 | 8,69E-02 |
| 2 | 6,06 | 6,04 | 6,91 | 7,96E-02 |
| 3 | 6,11 | 6,81 | 6,89 | 7,96E-02 |
| 5 | 1 | 1,45 | 1,25 | 1,01 | 8,55E-02 |
| 2 | 0,94 | 1,36 | 0,65 | 8,40E-02 |
| 3 | 1,00 | 0,82 | 1,78 | 7,70E-02 |

# Reference material production

**Table S9**. Analysis of variance of homogeneity between bottles of pilot batches

| **Origin of variations** | **Sum of squares** | **Degrees of freedom** | **Average of squares** | **Fcal** | **P(0,05)** | **Fcrit** |
| --- | --- | --- | --- | --- | --- | --- |
| **Low level concentration batch100 copies/μL** | | | | | | |
| **Between groups** | 501 | 7 | 71.6 | 1.16 | 0.34 | 2.25 |
| **Within groups** | 2465 | 40 | 61.6 |  |  |  |
| **Total** | 2966 | 47 |  |  |  |  |
| **High level concentration Batch 100.000 copies/μL** | | | | | | |
| **Between groups** | 91965676 | 7 | 13137953 | 1.17 | 0.37 | 2.66 |
| **Within groups** | 179023138 | 16 | 11188946 |  |  |  |
| **Total** | 270988815 | 23 |  |  |  |  |

**Table S10.**  Regression analysis results for short and long term stability study for high (HL) and low (LL) concentration level materials at 4ºC and -20ºC.

| **Study** | **Material/condition** | **Slope** | **Intercept** | **R2** | **p-value** |
| --- | --- | --- | --- | --- | --- |
| STS | LL-4ºC | 0.000244 | 0.9902 | 0.003526 | 0.9406 |
| LL -20ºC | 0.00200 | 0.9499 | 0.07817 | 0.7204 |
| HL-4ºC | 0.00108 | 0.9768 | 0.5628 | 0.2498 |
| HL -20ºC | -0.00096 | 0.9637 | 0.3217 | 0.4328 |
| LTS | LL-4ºC | 0.00085 | 0.9792 | 0.3537 | 0.2131 |
| LL -20ºC | -0.00041 | 0.9614 | 0.09906 | 0.5435 |
| HL-4ºC | 0.00150 | 0.9613 | 0.4255 | 0.1603 |
| HL -20ºC | 0.00013 | 0.9587 | 0.1200 | 0.5012 |

**Table S11.**  Regression analysis results for short and long term stability study for high (HL) and low (LL) concentration level materials at 4ºC and -20ºC.

| **Condition** | **Slope** | **Standard error** | **relative uncertainty** | **u absolut uncertainty** |
| --- | --- | --- | --- | --- |
| LTS 4 HL | 0,00150 | 0,0008727 | 0,052362 | 8632 |
| LTS-20 HL | 0,00013 | 0,0001843 | 0,011058 | 1823 |
| LTS 4 LL | 0,00085 | 0,000577 | 0,03462 | 5,95 |
| LTS-20 LL | -0,00041 | 0,0006171 | 0,037026 | 6,37 |

**Supplementary Information SI 1**

| T.test (performed with R Version 4.4.3) | |
| --- | --- |
| Low concentration level  Two Sample t-test  data: LL_Z3276 and LL_rfbE  t = -3.3751, df = 52, p-value = 0.001402  alternative hypothesis: true difference in means is not equal to 0  95 percent confidence interval:  -11.218848 -2.852748  sample estimates:  mean of x mean of y  168.1533 175.1891 | High Concentration level  Two Sample t-test  data: HL_Z3276 and HL_rfbE  t = -7.0148, df = 46, p-value = 8.658e-09  alternative hypothesis: true difference in means is not equal to 0  95 percent confidence interval:  -9619.664 -5329.899  sample estimates:  mean of x mean of y  161032.7 168507.5 |

**Table S12.** Characterization results of batch 100.000 copies/μL with Z3276

| **Day** | **Sample** | **Result by days** | | | | | **Total result** | |
| --- | --- | --- | --- | --- | --- | --- | --- | --- |
| **Value** | **u comb.** | **u rel** | **Average** | **u comb. Day** | **Average** | **u comb.** |
| 1 | 190401-08P-26 | 133250 | 2203 | 1,7% | 161795 | 1806 | 161117 | 3975 |
| 190401-08P-42 | 161762 | 2619 | 1,6% |
| 190401-08P-66 | 161827 | 2486 | 1,5% |
| 2 | 190401-08P-10 | 162900 | 2894 | 1,8% | 162945 | 1775 |
| 190401-08P-50 | 164668 | 2462 | 1,5% |
| 190401-08P-58 | 161266 | 2288 | 1,4% |
| 3 | 190401-08P-18 | 154070 | 2568 | 1,7% | 158613 | 2777 |
| 190401-08P-34 | 159595 | 2354 | 1,5% |
| 190401-08P-75 | 162174 | 2415 | 1,5% |

**Table S13.** Characterization results of batch 100.000 copies/μL with *rfbE*

| **Day** | **Sample** | **Result by days** | | | | | **Total result** | |
| --- | --- | --- | --- | --- | --- | --- | --- | --- |
| **Value** | **u comb.** | **u rel** | **Average** | **u comb. Day** | **Average** | **u comb.** |
| 1 | 190401-08P-26 | 141085 | 2166 | 1,5% | 169427 | 2879 | 168610 | 3858 |
| 190401-08P-42 | 171661 | 2526 | 1,5% |
| 190401-08P-66 | 167194 | 2610 | 1,6% |
| 2 | 190401-08P-10 | 169707 | 2522 | 1,5% | 170103 | 1526 |
| 190401-08P-50 | 171153 | 2450 | 1,4% |
| 190401-08P-58 | 169449 | 2463 | 1,5% |
| 3 | 190401-08P-18 | 164628 | 2404 | 1,5% | 166299 | 1702 |
| 190401-08P-34 | 159595 | 2354 | 1,5% |
| 190401-08P-75 | 162174 | 2415 | 1,5% |

**Table S14.** Characterization results of batch 100 copies/μL with Z3276

| **Day** | **Sample** | **Result by days** | | | | | **Total result** | |
| --- | --- | --- | --- | --- | --- | --- | --- | --- |
| **Value** | **u comb.** | **u rel** | **Average** | **u comb. Day** | **Average** | **u comb.** |
| 1 | 190401-10P-24 | 160,18 | 6,52 | 4,1% | 164 | 4 | 168 | 8 |
| 190401-10P-51 | 163,79 | 6,29 | 3,8% |
| 190401-10P-59 | 167,05 | 6,29 | 3,8% |
| 2 | 190401-10P-16 | 170,29 | 6,44 | 3,8% | 169 | 4 |
| 190401-10P-67 | 171,42 | 6,55 | 3,8% |
| 190401-10P-76 | 166,29 | 6,25 | 3,8% |
| 3 | 190401-10P-08 | 167,32 | 6,48 | 3,9% | 171 | 4 |
| 190401-10P-32 | 171,96 | 6,44 | 3,7% |
| 190401-10P-40 | 175,08 | 6,41 | 3,7% |

**Table S15.** Characterization results of batch 100 copies/μL with *rfbE*

| **Day** | **Sample** | **Result by days** | | | | | **Total result** | |
| --- | --- | --- | --- | --- | --- | --- | --- | --- |
| **Value** | **u comb.** | **u rel** | **Average** | **u comb. Day** | **Average** | **u comb.** |
| 1 | 190401-10P-24 | 177 | 6,44 | 3,6% | 177 | 4 | 175 | 8 |
| 190401-10P-51 | 181 | 6,74 | 3,7% |
| 190401-10P-59 | 175 | 7,81 | 4,5% |
| 2 | 190401-10P-16 | 183 | 7,24 | 4,0% | 177 | 6 |
| 190401-10P-67 | 170 | 6,32 | 3,7% |
| 190401-10P-76 | 179 | 6,63 | 3,7% |
| 3 | 190401-10P-08 | 171 | 6,82 | 4,0% | 171 | 4 |
| 190401-10P-32 | 171 | 6,46 | 3,8% |
| 190401-10P-40 | 172 | 6,67 | 3,9% |

**Figure S3**

Short term stability study results (relative to controls) for High and low level copy number concentration batches.


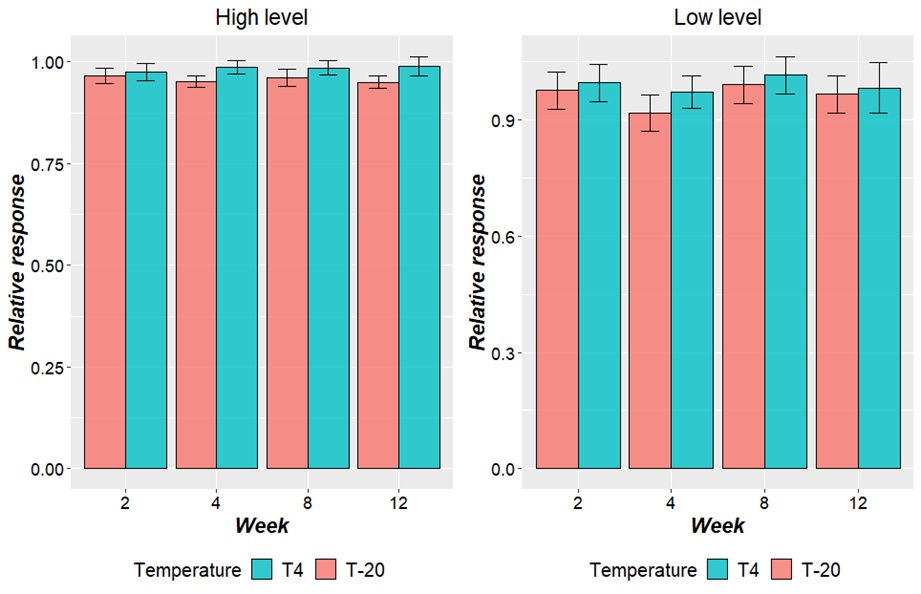


**Figure S4**. *Uncertainty estimation candidate for reference material*


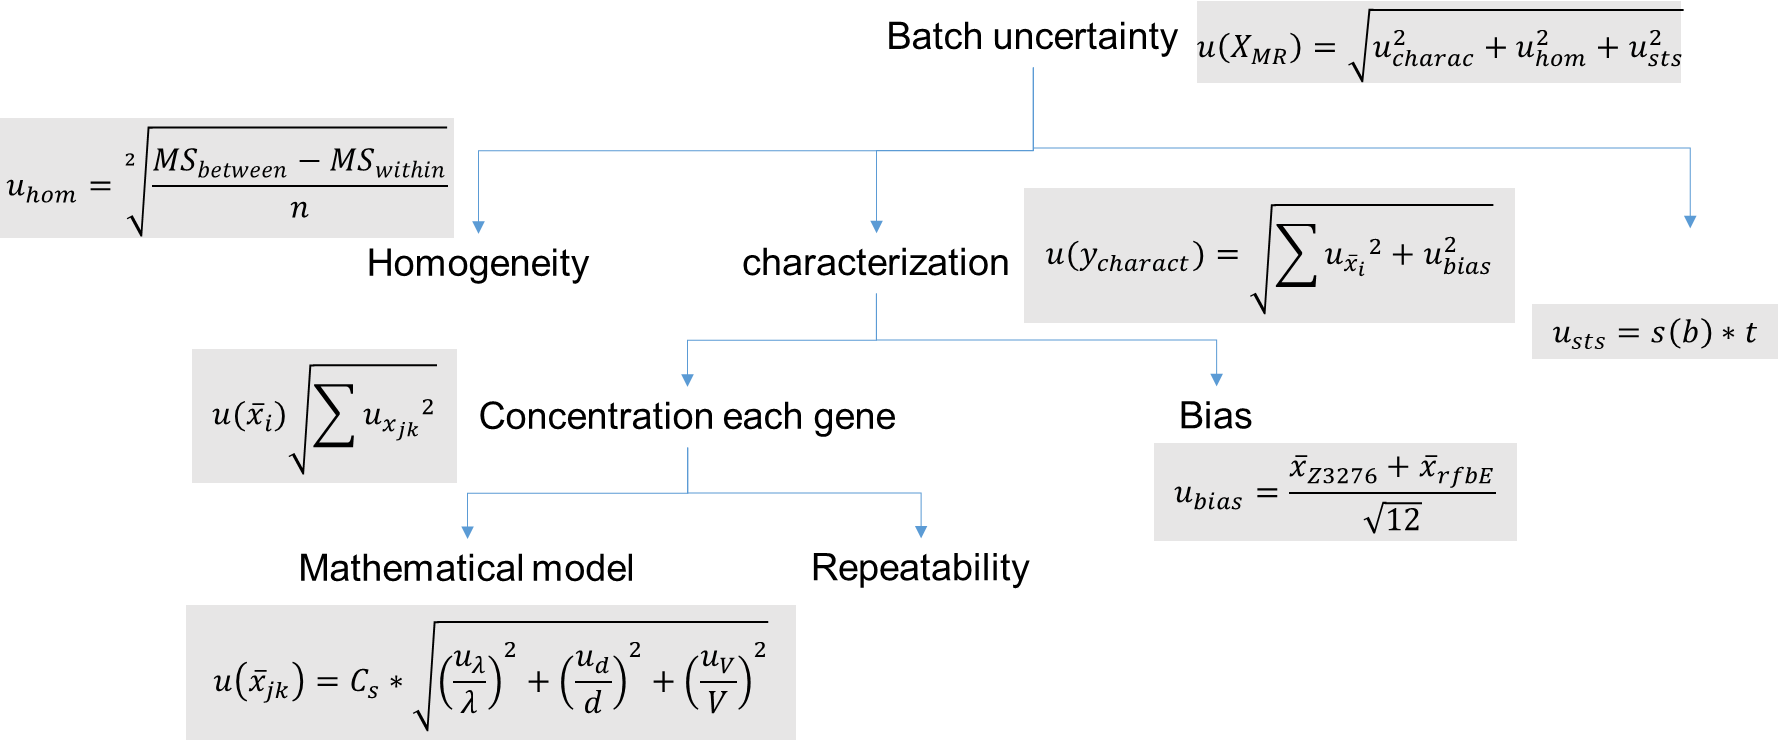


**Table S16**. dMIQE checklist

| **ITEM TO CHECK** | **IMPORTANCE** | **Comments** |
| --- | --- | --- |
| **EXPERIMENTAL DESIGN** |  |  |
| Definition of experimental and control groups | **E** | Not applicable |
| Number within each group | **E** | Not applicable |
| Assay carried out by core lab or investigator's lab? | D | Investigator’s lab |
| Power analysis | D | Not applicable |
| **SAMPLE** |  |  |
| Description | **E** | Included in manuscript |
| Volume or mass of sample processed | **E** | Included in manuscript |
| Microdissection or macrodissection | **E** | Not applicable |
| Processing procedure | **E** | Not applicable |
| If frozen - how and how quickly? | **E** | Not applicable |
| If fixed - with what, how quickly? | **E** | Not applicable |
| Sample storage conditions and duration (especially for FFPE samples) | **E** | Included in manuscript |
| **NUCLEIC ACID EXTRACTION** |  |  |
| Quantification - instrument/method | **E** | Included in the manuscript |
| Storage conditions: temperature, concentration, duration, buffer | **E** | Included in the manuscript |
| DNA or RNA quantification | **E** | Included in the manuscript |
| Quality/integrity-instrument/method; e.g. RIN/RQI and trace or 3’:5’ | **E** | Included in the manuscript |
| Template structural information | **E** | Not applicable |
| Template modification (digestion, sonication, pre-amplification etc.) | **E** | Not applicable |
| Template treatment (initial heating or chemical denaturation) | **E** | Not applicable |
| Inhibition dilution or spike; | **E** | Not applicable |
| DNA contamination assessment of RNA sample | **E** | Included in the manuscript |
| Details of DNase treatment where performed | **E** | Included in the manuscript |
| Manufacturer of reagents used and catalogue number | D | Not applicable |
| Storage of nucleic acid: temperature, concentration, duration, buffer | **E** | Included in the manuscript |
| **REVERSE TRANSCRIPTION (If necessary)** |  |  |
| cDNA priming method + concentration | **E** | Not applicable |
| One or two step protocol | **E** | Not applicable |
| Amount of RNA used per reaction | **E** | Not applicable |
| Detailed reaction components and conditions | **E** | Not applicable |
| RT efficiency | D | Not applicable |
| Estimated copies measured with and without addition of RT | D | Not applicable |
| Manufacturer of reagents used and catalogue number | D | Not applicable |
| Reaction volume (for two step reverse transcription reaction) | D | Not applicable |
| Storage of cDNA: temperature, concentration, duration, buffer | D | Not applicable |
| **dPCR TARGET INFORMATION** |  |  |
| Sequence accession number | **E** | Included in manuscript |
| Location of amplicon | D | uidA: 2369650 - 2396742  lacY: 418928 - 419080  eaeA: 4667314 - 4667415  rfbE: 2852517 - 2852604  stx1: 2996304 - 2996434  stx2: 1352836 - 1352963  Z3276: 2933746 - 2933860  Reference location in *Escherichia coli O157:H7 str. EDL933, complete sequence.*  GenBank NC_002655 |
| Amplicon length | **E** | Included in manuscript |
| In silico specificity screen (BLAST, etc) | **E** | Included in supplementary information |
| Pseudogenes, retropseudogenes or other homologs? | D | Not applicable |
| Sequence alignment | D | Included in supplementary information |
| Secondary structure analysis of amplicon and GC content | D | Included in supplementary information |
| Location of each primer by exon or intron (if applicable) | **E** | Not applicable |
| Where appropriate, which splice variants are targeted? | **E** | Not applicable |
| **dPCR OLIGONUCLEOTIDES** |  |  |
| Primer sequences and/or amplicon context sequence | **E** | Included in manuscript |
| RTPrimerDB Identification Number | D | Not included |
| Probe sequences | D | Included in manuscript |
| Location and identity of any modifications | **E** | Not applicable |
| Manufacturer of oligonucleotides | D | Included in manuscript |
| Purification method | D | RPC for primers and RP HPLC/dual HPLC for probes |
| **dPCR PROTOCOL** |  |  |
| Complete reaction conditions | **E** | Included in manuscript |
| Reaction volume and amount of RNA/cDNA/DNA | **E** | Included in manuscript |
| Primer, (probe), Mg++ and dNTP concentrations | **E** | Included in manuscript |
| Polymerase identity and concentration | **E** | Included in manuscript |
| Buffer/kit Catalogue No and manufacturer | **E** | Included in manuscript |
| Exact chemical constitution of the buffer | D | Not applicable |
| Additives (SYBR Green I, DMSO, etc.) | **E** | Not applicable |
| Plates/tubes Catalogue No and manufacturer | D | Included in manuscript |
| Complete thermocycling parameters | **E** | Included in manuscript |
| Reaction setup | D | Included in manuscript |
| Gravimetric or volumetric dilutions (manual/robotic) | D | Manual |
| Total PCR reaction volume prepared | D | Included in manuscript |
| Partition number | **E** | 13000 - 19000 |
| Individual partition volume | **E** | Included in manuscript |
| Total volume of the partitions measured (effective reaction size) | **E** | 10.6 – 15.6 uL |
| Partition volume variance/standard deviation | D | Not applicable |
| Comprehensive details and appropriate use of controls | **E** | Included in manuscript |
| Manufacturer of dPCR instrument | **E** | Included in manuscript |
| **dPCR VALIDATION** |  |  |
| Optimisation data for the assay | D | Not included in manuscript |
| Specificity (when measuring rare mutations, pathogen sequences etc.) | **E** | Included in manuscript |
| Limit of detection of calibration control | D | Included in manuscript |
| If multiplexing, comparison with singleplex assays | **E** | Not included in manuscript |
| **DATA ANALYSIS** |  |  |
| Average copies per partition (λ or equivalent) | **E** | L1: 7,920 cp/uL  L2: 718 cp/uL  L3: 66 cp/uL  L4: 6.6 cp/uL  L5: 1.3 cp/uL |
| dPCR analysis program (source, version) | **E** | Included in manuscript |
| Outlier identification and disposition | **E** | Included in manuscript |
| Results of NTCs | **E** | Included in manuscript |
| Examples of positive(s) and negative experimental results as supplemental data | **E** | Included in supplementary information |
| Where appropriate, justification of number and choice of reference genes | **E** | Included in manuscript |
| Where appropriate, description of normalization method | **E** | Not applicable |
| Number and concordance of biological replicates | D | Not applicable |
| Number and stage (RT or qPCR) of technical replicates | **E** | Included in manuscript |
| Repeatability (intra-assay variation) | **E** | Included in manuscript |
| Reproducibility (inter-assay/user/lab etc. variation) | D | Included in manuscript |
| Experimental variance or confidence interval | **E** | Included in manuscript |
| Statistical methods used for analysis | **E** | Included in manuscript |
| Data submission using RDML | D | Not included in manuscript |

E: Essential information, D: Desirable information

# References

[1] E. Theres, M. Polt, M. Konrad-k, P. Kinner, A. Sessitsch, and T. Kosti, “Evaluation of quantitative PCR combined with PMA treatment for molecular assessment of microbial water quality,” vol. 7, no. 0, pp. 367–376, 2014, doi: 10.1016/j.watres.2014.09.022.

[2] S. Das Mitrai *et al.*, “Duplex PCR for specific detection of Escherichia coli and its differentiation from other Enterobacteriaceae,” *Indian J. Anim. Sci.*, vol. 85, no. 8, pp. 16–19, 2015.

[3] K. Horakova, H. Mlejnkova, and P. Mlejnek, “Specific detection of Escherichia coli isolated from water samples using polymerase chain reaction targeting four genes: Cytochrome bd complex, lactose permease, ??-d-glucuronidase, and ??-d-galactosidase,” *J. Appl. Microbiol.*, vol. 105, no. 4, pp. 970–976, 2008, doi: 10.1111/j.1365-2672.2008.03838.x.

[4] E. M. Nielsen and M. T. Andersen, “Detection and Characterization of Verocytotoxin-Producing Escherichia coli by Automated 5 ′ Nuclease PCR Assay Detection and Characterization of Verocytotoxin-Producing Escherichia coli by Automated 5Ј Nuclease PCR Assay,” *J. Clin. Microbiol.*, vol. 41, no. 7, pp. 2884–2893, 2003, doi: 10.1128/JCM.41.7.2884.

[5] I. O. for S. ISO, “ISO/TS 13136:2012 - Microbiology of food and animal feed -- Real-time polymerase chain reaction (PCR)-based method for the detection of food-borne pathogens -- Horizontal method for the detection of Shiga toxin-producing Escherichia coli (STEC) and the determination of O157, O111, O26, O103 and O145 serogroups,” 2012. https://www.iso.org/standard/53328.html (accessed Mar. 21, 2019).

[6] B. Li and J. Chen, “Real-Time PCR Methodology for Selective Detection of Viable Escherichia coli O157 : H7 Cells by Targeting Z3276 as a Genetic,” vol. 78, no. 15, pp. 5297–5304, 2012, doi: 10.1128/AEM.00794-12.

[7] B. Li, H. Liu, and W. Wang, “Multiplex real-time PCR assay for detection of Escherichia coli O157 : H7 and screening for non-O157 Shiga toxin-producing E . coli,” pp. 1–13, 2017, doi: 10.1186/s12866-017-1123-2.
